# Supplementary material for: Nalmefene non-enantioselectively targets myeloid differentiation protein 2 and inhibits toll-like receptor 4 signaling: wet-lab techniques andin silicosimulations
Source: Royal Society of Chemistry journal article supplement (doi:10.1039/d1cp00237f), 2021-01-01
Supplement: d1cp00237f1.pdf [file d1cp00237f1.pdf]

## Supplementary Information

### **Nalmefene non-enantioselectively targets myeloid differentiation protein 2 and inhibits Toll-like receptor 4 signaling: wet-lab techniques and *in silico* simulations**

Xiaozheng Zhang<sup>a</sup>, Hongshuang Wang<sup>b,\*</sup>, Yibo Wang<sup>b</sup>, Hongyuan Li<sup>b</sup>, SiruWu<sup>b,c</sup>,  
Jingwei Gao<sup>b,c</sup>, Tianshu Zhang<sup>b</sup>, Jun Xie<sup>a,\*</sup>, Xiaohui Wang<sup>b,c,\*</sup>

<sup>a</sup>Department of Biochemistry and Molecular Biology, Shanxi Key Laboratory of Birth Defect and Cell Regeneration, Shanxi Medical University, Taiyuan, Shanxi, 030001, China

<sup>b</sup>Laboratory of Chemical Biology, Changchun Institute of Applied Chemistry, Chinese Academy of Sciences, Changchun, Jilin, 130022, China

<sup>c</sup>Department of Applied Chemistry and Engineering, University of Science and Technology of China, Hefei, 230026, China

\* Corresponding author

E-mail: [hongshuang.wang@ciac.ac.cn](mailto:hongshuang.wang@ciac.ac.cn)

E-mail: [junxie@sxmu.edu.cn](mailto:junxie@sxmu.edu.cn)

E-mail: [xiaohui.wang@ciac.ac.cn](mailto:xiaohui.wang@ciac.ac.cn);

**Table S1** MM/PBSA derived binding free energies (kcal/mol) for nalmefene binding to murine MD-2

|                             | $\Delta E_{\text{vdW}}$ | $\Delta E_{\text{ele}}$ | $\Delta G_{\text{sol-polar}}$ | $\Delta G_{\text{sol-nonpolar}}$ | $\Delta G_{\text{binding}}$ |
|-----------------------------|-------------------------|-------------------------|-------------------------------|----------------------------------|-----------------------------|
| (+)-nalmefene               | -47.3±0.3               | -1.2±0.1                | 5.2±0.1                       | 24.8±0.2                         | -18.4±0.4                   |
| (-)-nalmefene               | -43.2±0.4               | -1.1±0.1                | 4.7±0.1                       | 21.9±0.2                         | -17.8±0.4                   |
| (+)-naltrexone <sup>a</sup> | -44.5±0.1               | -1.6±0.1                | 5.5±0.1                       | 23.7±0.1                         | -16.9±0.2 <sup>a</sup>      |
| (-)-naltrexone <sup>a</sup> | -47.8±0.3               | -1.4±0.1                | 6.6±0.1                       | 24.6±0.2                         | -18.0±0.3 <sup>a</sup>      |

Numbers after ± present standard errors;

<sup>a</sup>SeeRef.16

**Table S2.** The decomposition of per-residue binding free energies (kcal/mol) of nalmefene and naltrexone binding to murine MD-2

|         | Compound      |               |                             |                             |
|---------|---------------|---------------|-----------------------------|-----------------------------|
| Residue | (+)-nalmefene | (-)-nalmefene | (+)-naltrexone <sup>a</sup> | (-)-naltrexone <sup>a</sup> |
| Trp23   |               | -2.3±0.4      |                             |                             |
| Ser48   |               | -1.5±0.9      | -1.5±.9                     |                             |
| Ile52   |               | -1.6±0.3      | -1.4±0.3                    | -2.3±0.5                    |
| Val61   | -1.1±0.2      | -1.2±0.3      | -1.6±0.4                    | -1.2±0.3                    |
| Phe76   | -2.3±0.7      |               | -2.1±0.4                    | -1.7±0.4                    |
| Leu78   | -2.0±0.3      | -1.3±0.3      |                             | -1.4±0.3                    |
| Ile80   |               |               |                             |                             |
| Arg90   | -1.1±0.2      |               |                             |                             |
| Glu92   | -1.3±0.3      |               | -1.5±0.4                    | -1.5±0.7                    |
| Phe119  | -2.6±0.4      | -1.8±0.3      | -2.2±0.4                    | -1.5±0.4                    |
| Phe121  | -1.3±0.4      | -1.6±0.4      | -1.5±0.5                    | -1.1±0.3                    |
| Ala135  | -1.4±0.4      |               |                             |                             |
| Cys133  | -1.0±0.3      | -1.0±0.3      |                             |                             |
| Leu149  | -1.2±0.3      |               |                             |                             |
| Phe151  | -3.1±0.4      | -3.1±0.4      | -2.7±0.5                    | -2.2±0.5                    |

Numbers after ± present standard error

<sup>a</sup>SeeRef.16

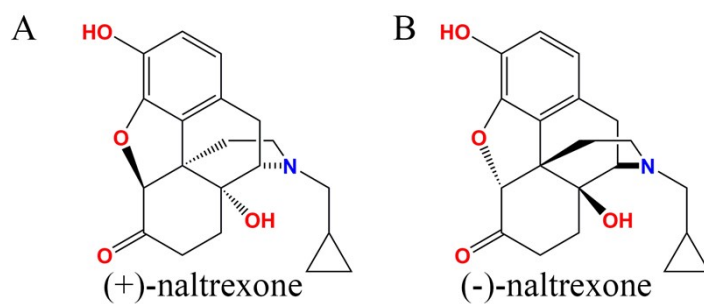

**Figure S1.** Structures of (+)-naltrexone and (-)-naltrexone.

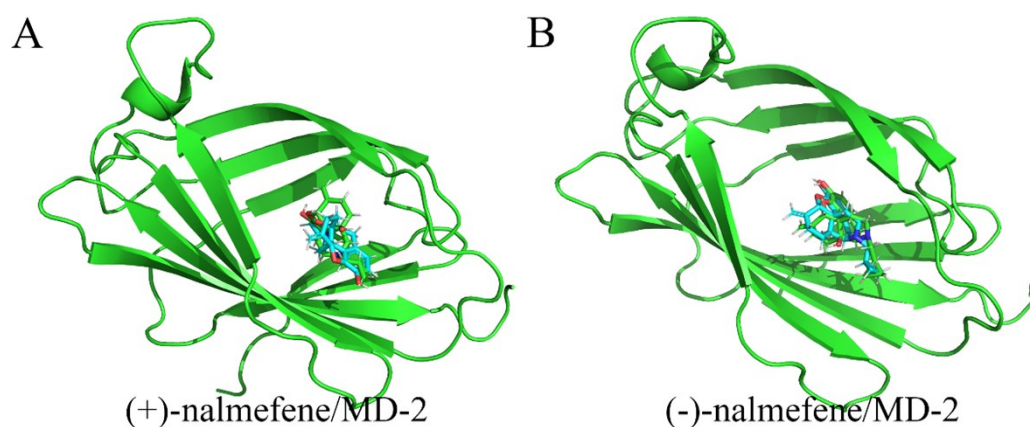

**Figure S2.** Alignment of docking poses from Autodock Vina (green stick) and Glide XP (cyan stick). Human MD-2 is shown as green cartoon.

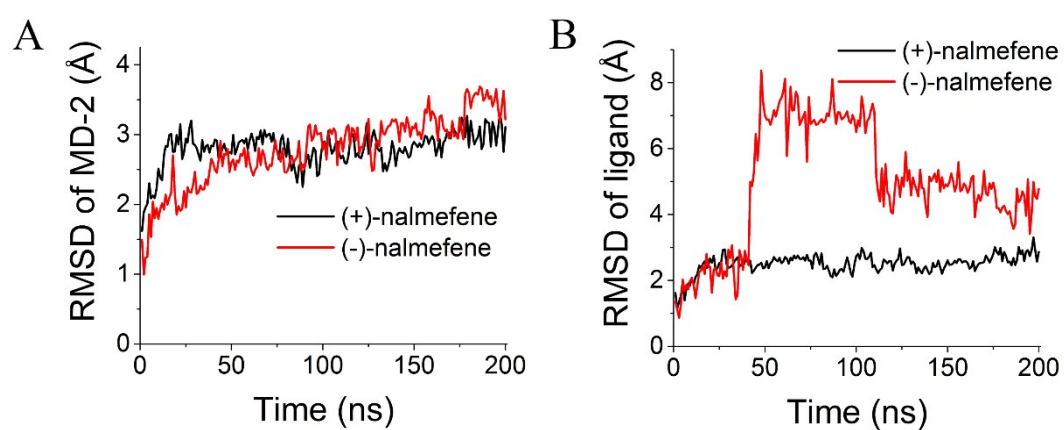

**Figure S3.** Time evolution of C $\alpha$  RMSDs of human MD-2 (A) and ligand (B) during MD simulation. Black and red colors indicate (+)-nalmefene and (-)-nalmefene, respectively.

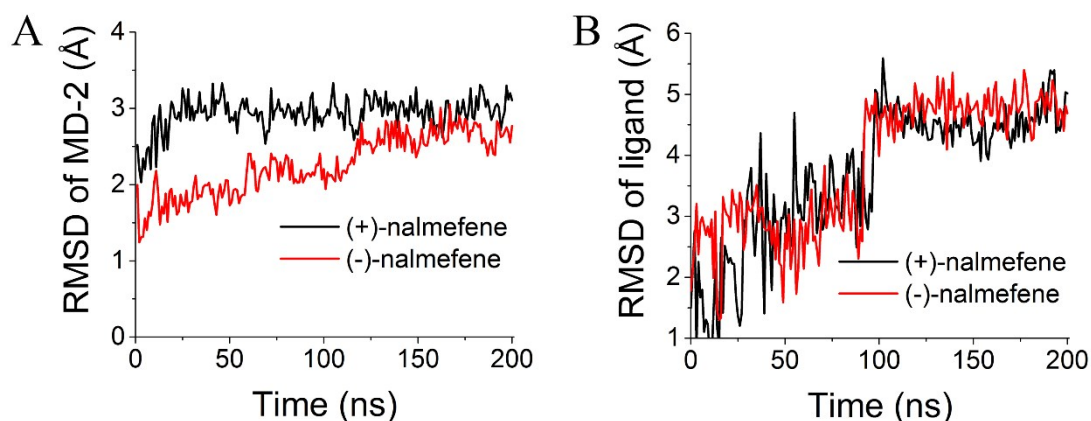

**Figure S4.** Time evolution of C $\alpha$  RMSD of murine MD-2 (A) and ligand (B) during MD simulation. Black and red colors indicate (+)-nalmeffene and (-)-nalmeffene, respectively.

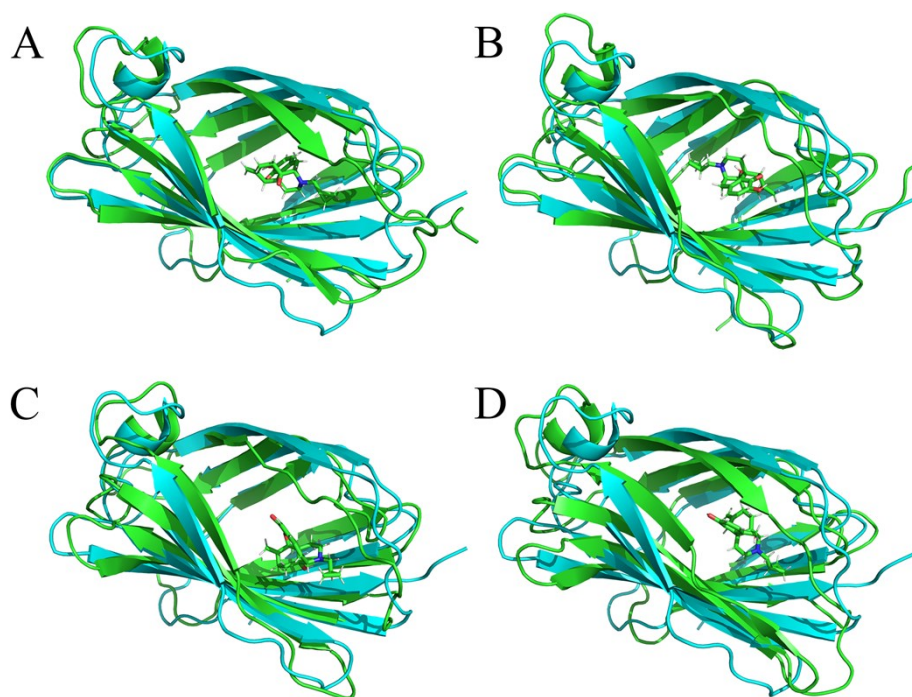

**Figure S5.** Overlap of the conformation of MD-2 ((A-B), human MD-2; (C-D), murine MD-2) bound to LPS ((A-B), PDB ID: 2E59; (C-D), PDB ID: 2Z64); both in cyan) with the representative structures of MD-2 interacted with nalmeffene ((A, C), (+)-nalmeffene; (B, D), (-)-nalmeffene) with the lowest energy (in green).

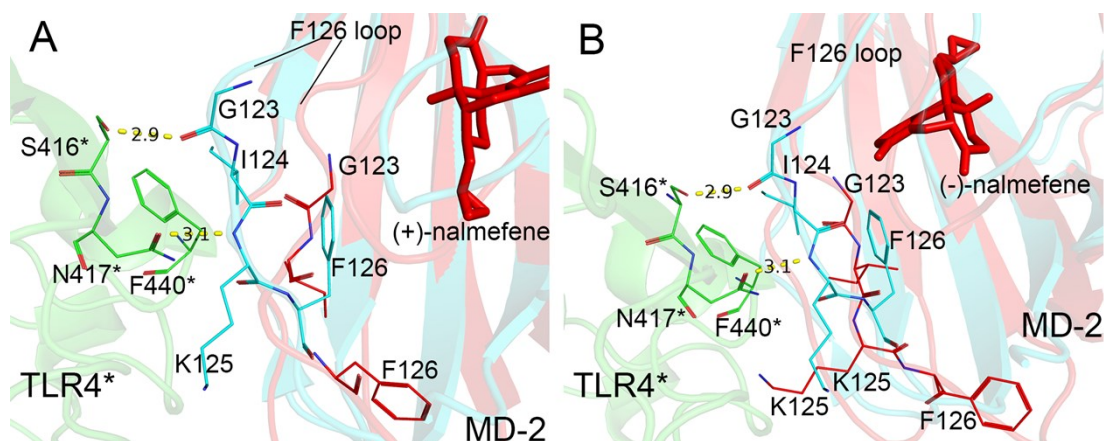

**Figure S6.** The main dimerization interface between the the F126 loop of MD-2 and TLR4\* that is from the adjacent copy of TLR4-MD-2. Overlap of the conformation of active MD-2 (cyan) with the representative structures of MD-2 interacted with (+)-nalmefene (red) (A) and (-)-nalmefene (red) (B), with the lowest energy. TLR4\* was shown as green cartoon, the key residues in dimerization interface were shown as stick. Binding of nalmefene to MD-2 abolishes most of the key interactions between MD-2 F126 loop and TLR4\*.

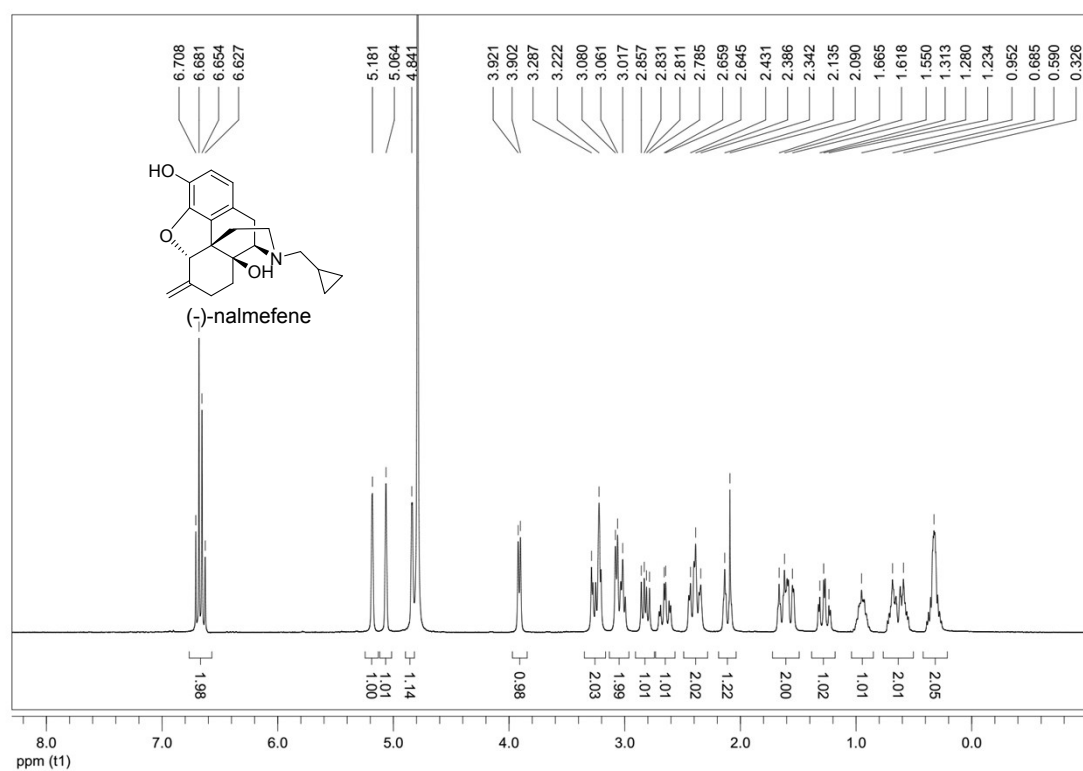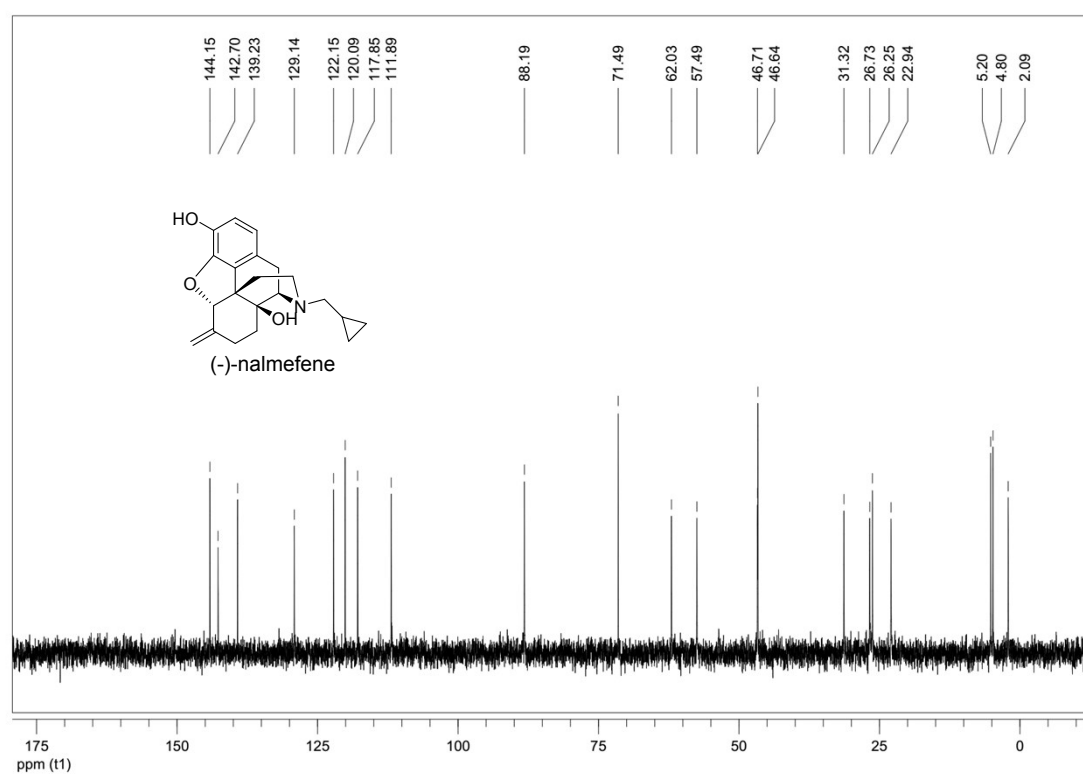

**Figure S7.** <sup>1</sup>H NMR and <sup>13</sup>C NMR spectra of (-)-nalmevene

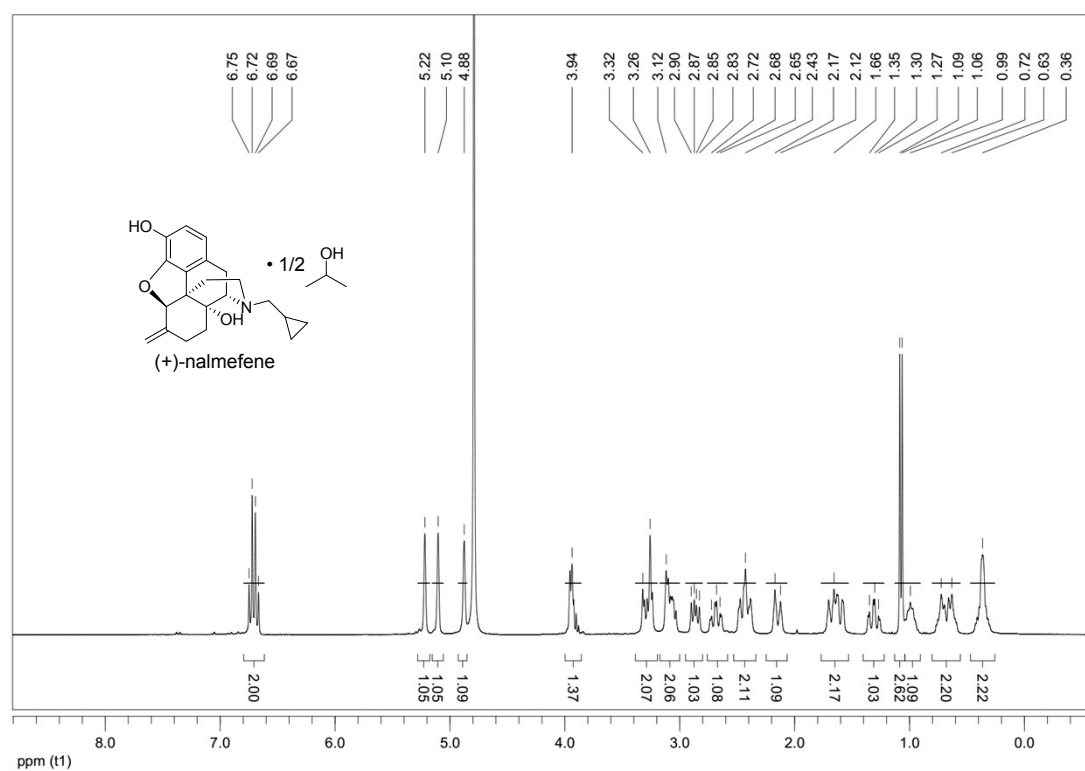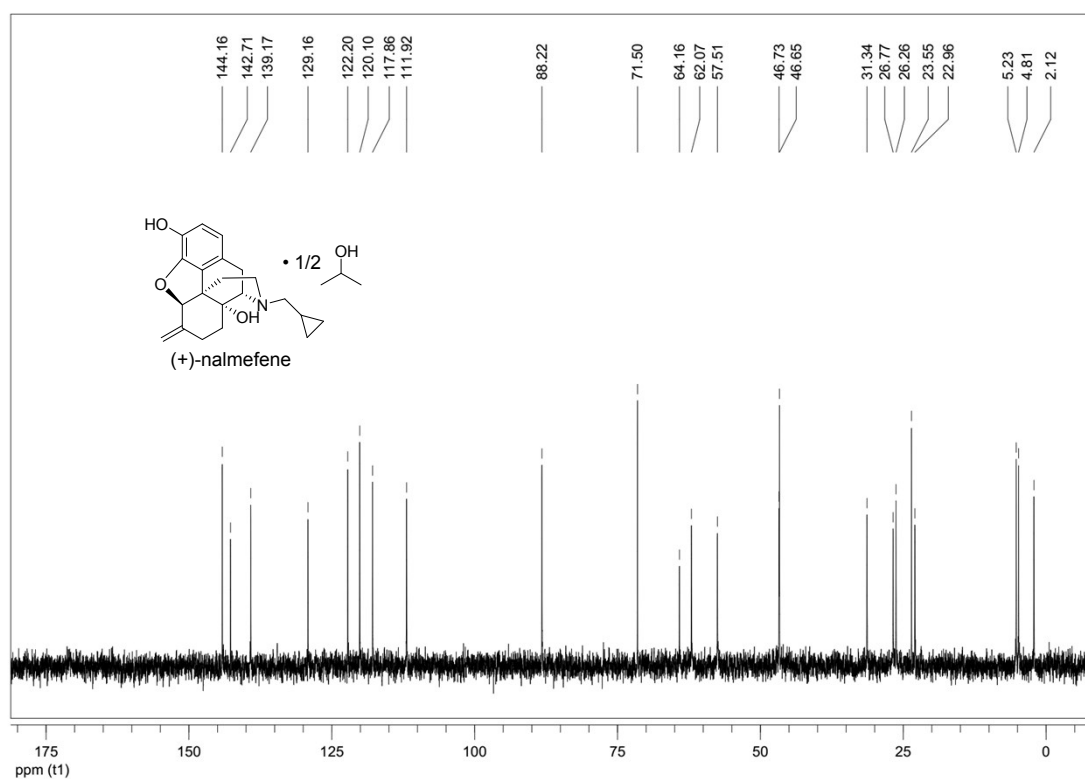

**Figure S8.** <sup>1</sup>H NMR and <sup>13</sup>C NMR spectra of (+)-nalmefene
